1 Maternal nutritional stress alters sperm competence in male mice  
2 offspring leading to reduced fertility

3

4 Yuki Muranishi <sup>1,2</sup>, Laurent Parry <sup>1</sup>, Mélanie Vachette-Dit-Martin <sup>1</sup>, Fabrice Saez <sup>3</sup>, Cécile Coudy-  
5 Gandilhon <sup>1</sup>, Pierre Sauvanet <sup>4,5</sup>, David Volle <sup>6</sup>, Jérémy Tournayre <sup>1</sup>, Serge Bottari <sup>7</sup>,  
6 Francesca Carpentiero <sup>7,8</sup>, Jessica Escoffier <sup>7,8</sup>, Alain Bruhat <sup>1</sup>, Anne-Catherine Maurin <sup>1</sup>, Julien  
7 Averous <sup>1</sup>, Christophe Arnoult <sup>7,8</sup>, Pierre Fafournoux\*<sup>1</sup>, Céline Jousse \*<sup>1</sup>

8

9 <sup>1</sup> Unité de Nutrition Humaine, INRAE, Université Clermont Auvergne, UMR1019, F-63000  
10 Clermont-Ferrand, France.

11 <sup>2</sup> Current address: Department of Life and Food Sciences, Obihiro University of Agriculture and  
12 Veterinary Medicine, Obihiro, Hokkaido 080-8555, Japan

13 <sup>3</sup> GReD Institute, Université Clermont Auvergne, Inserm, CNRS, 28 place Henri Dunant, TSA  
14 50400, CEDEX 1, 63001 Clermont-Ferrand, France

15 <sup>4</sup> UMR 1071 Inserm/Université Clermont Auvergne; USC-INRA 2018, Microbes, Intestin,  
16 Inflammation et Susceptibilité de l'Hôte (M2iSH), Clermont-Ferrand, France.

17 <sup>5</sup> Service de chirurgie et hépatobiliaire, CHU Clermont-Ferrand, F-63003, Clermont-Ferrand,  
18 France

19 <sup>6</sup> Inserm U1103, CNRS UMR6293–Université Clermont Auvergne, Institute Genetic, Reproduction  
20 and Development, Team "Environment, Metabolism, Spermatogenesis and Pathophysiology &  
21 Inheritance", 28 place Henri Dunant, TSA 50400, 63001 Clermont-Ferrand Cedex 1

22 <sup>7</sup> Université Grenoble Alpes, Grenoble, F-38000, France

23 <sup>8</sup> Institute for Advanced Biosciences INSERM U1209, CNRS UMR5309, Grenoble, F-38000,  
24 France

25 \* Corresponding Authors

26 **Email:** [celine.jousse@inrae.fr](mailto:celine.jousse@inrae.fr), [pierre.fafournoux@inrae.fr](mailto:pierre.fafournoux@inrae.fr)

27 C. Jousse: <https://orcid.org/0000-0002-3146-249X>

28 P. Fafournoux : <https://orcid.org/0000-0002-4900-4331>

29

30

31 **Keywords**

32 nutritional programming, male fertility, sperm capacitation

## 1 **Author Contributions**

2 YM, CA, PF, CJ contributed to the conception and design of the study. JE, FC, YM, LP, MVDM,  
3 FS, CCG, PS, CJ performed the experiments. JT and SB provided reagent, materials or analysis  
4 tools. Data were analyzed by YM, CA, PF, CJ, FS, DV. The article was written by PF and CJ and  
5 critically revised by CA, AB, ACM, JA.

## 6 **This PDF file includes:**

7 Main Text  
8 Figures 1 to 4  
9 Figures S1 to S2

## 10 **Abstract**

11 Infertility represents a growing burden worldwide, with one in seven couples presenting difficulties  
12 conceiving. Amongst these, 10-15% of the men have idiopathic infertility that does not correlate  
13 with any defect in the classical sperm parameters measured. In the present study, we used a mouse  
14 model to investigate the effects of maternal undernutrition on fertility in male progeny. Our results  
15 indicate that mothers fed on a low protein diet during gestation and lactation produce male offspring  
16 with normal sperm morphology, concentration and motility but exhibiting an overall decrease of  
17 fertility when they reach adulthood. Particularly, sperm from these offspring show a remarkable  
18 lower capacity to fertilize oocytes when copulation occurs early in the estrus cycle relative to  
19 ovulation, due to an altered sperm capacitation.

20 Our data demonstrate for the first time that maternal nutritional stress can have long-term  
21 consequences on the reproductive health of male progeny by affecting sperm physiology,  
22 especially capacitation, with no observable impact on spermatogenesis and classical quantitative  
23 and qualitative sperm parameters. Moreover, our experimental model could be of major interest to  
24 study, explain, and ultimately treat certain categories of infertilities.

## 25 **Main Text**

### 26 **Introduction**

27 The “developmental origins of health and disease” (DOHaD) hypothesis proposes that maternal  
28 nutritional status during pregnancy and lactation plays a major role in postnatal growth and  
29 development of the offspring, determining long-term health status. This process, termed nutritional  
30 programming, allows specific adaptations to be made that permanently change the phenotype of  
31 the organism. These changes persist even in the absence of the early nutritional stress that initiated  
32 them, leading to lifelong health consequences. In humans, a considerable amount of evidence

1 indicates that maternal malnutrition during gestation can confer an increased risk of metabolic  
2 dysfunction in offspring <sup>1 2</sup>. In mice, several studies have also shown that maternal nutritional  
3 programming has long lasting effect on offspring metabolism <sup>3,4</sup>. For instance, we have  
4 demonstrated that pups born from mothers fed a Low Protein Diet (LPD) during gestation and  
5 lactation have an altered metabolic status in adulthood, displaying lower body weight, lower fat  
6 mass and hypermetabolism <sup>5,6</sup>.

7 However, very few studies have explored the effect of nutritional programming on other  
8 physiological functions, such as reproductive function. Infertility is increasing worldwide, and it  
9 currently affects about one in seven couples attempting to conceive <sup>7</sup>. In about 50% of cases,  
10 infertility is due to the male partner <sup>8</sup>. Meta-analyses <sup>9</sup> indicate that there has been a considerable  
11 decline in sperm quality since the 1940s suggesting a defects in spermatogenesis. However, a  
12 significant proportion of male infertility is idiopathic and not related to defect in spermatogenesis.  
13 Whatever the case, the reason for this infertility is not well understood, and it probably has  
14 multifactorial causes. Some authors suggest that reproductive disorders may have a  
15 developmental origin <sup>10</sup>. Indeed, a few studies report that, in sheep and rodents, maternal dietary  
16 restriction impairs reproductive performance in female offspring <sup>11,12</sup>. Similarly, testicular  
17 development and reproductive performance of male offspring has been linked to maternal protein  
18 restriction <sup>13</sup>. However, the underlying causes are unknown.

19 Here, we investigated the effects of maternal undernutrition on the offspring's fertility. We used the  
20 well-characterized model of dams fed an isocaloric LPD during both gestation and lactation. Our  
21 results indicate that low dietary protein intake by dams is associated with reduced fertility in male  
22 offspring due to altered sperm fitness. For these males, fertilization capacity is reduced when  
23 copulation takes place early in the estrus cycle relative to ovulation.

## 24 **Results**

### 25 Maternal undernutrition alters fertility in offspring

26 Female Balb/c mice were fed either a control diet (CD) or an LPD throughout pregnancy and  
27 lactation. After weaning, the F1-CD and F1-LPD offspring – born and suckled from CD- or LPD-fed  
28 mothers, respectively – were fed a standard chow diet. At the age of six months, both male and  
29 female F1-LPD exhibited a lower body weight than their F1-CD counterparts (Figure 1A). Moreover,  
30 male F1-LPD offspring had a significantly lower perigonadal-White Adipose Tissue weight  
31 (pg-WAT). Even though a similar pg-WAT difference was observed in F1-LPD females, due to  
32 greater interindividual variability in females the difference was not significant (Figure 1A). This gross  
33 anatomical phenotype was also associated with a shorter AnoGenital Distance (AGD) in F1-LPD  
34 males compared to F1-CD males. AGD is a marker of differentiation of male and female external  
35 genitalia, and a lower AGD is commonly used as a predictive indicator of diminished reproductive

1 function in the mature male <sup>14,15</sup>. To adjust AGD to compensate for differences in weight between  
2 animals, Gallavan et al. <sup>16</sup> reported that the cube root of body weight would be an appropriate  
3 standard to use. The corrected factor, called AGI (anogenital Index), was also significantly reduced  
4 in F1-LPD males compared to F1-CD males. Interestingly, even though AGD may also have an  
5 impact on female fertility <sup>17</sup>, maternal undernutrition affected neither AGD nor AGI in F1-LPD  
6 females (Figure 1A).

7 In light of the observation of indicators of potential fertility problems, we measured fertility rates for  
8 both F1-CD and F1-LPD animals. First, adult F1-CD or F1-LPD males were mated with control  
9 females. We observed no difference in the number of plugged females relative to the total number  
10 of mated females between the two groups (86% with F1-CD vs 82% with F1-LPD males). Thus,  
11 copulation occurred at the same rate for F1-LPD and F1-CD males. However, the fertility rate  
12 recorded (Figure 1B) – calculated as the percentage of plugged females that went on to develop a  
13 pregnancy – was significantly different between the two groups. Reduced fertility was noted for F1-  
14 LPD males (63%) compared to F1-CD males (92%). Thus, the fertility of male mice is affected by  
15 maternal perinatal undernutrition. Interestingly, litter size was not significantly different between the  
16 two groups (Figure 1C). Based on these results, we can conclude that the reduced fertility observed  
17 for the F1-LPD males was thus not the result of behavioral problems, such as prostration, or of  
18 production of completely fertilization-incompetent sperm.

19 In contrast, when F1-CD or F1-LPD females were mated with control males, fertility in F1-LPD  
20 females was only slightly lower than in F1-CD females, and the difference was not statistically  
21 significant (Figure S1). Maternal nutritional stress may affect fertility in female offspring through  
22 several mechanisms. Firstly, it can affect gonad development (even though the female AGD was  
23 not significantly altered). Secondly, it is also possible that the maternal LPD diet causes several  
24 metabolic/endocrine alterations that could create an inadequate metabolic environment for optimal  
25 pregnancy. To definitively determine whether female fertility is affected by maternal nutritional  
26 stress, further experiments would be required which are out of the scope of this study. For the  
27 remainder of this study, we decided to focus our investigations on the causes of the decline in male  
28 fertility.

### 29 Maternal protein malnutrition effects on sexual organ development and sperm count

30 It is considered useful to measure the mass of sexual organs such as the testis, epididymis, and  
31 seminal vesicle to assess alterations to the male reproductive system. We thus first investigated  
32 whether maternal undernutrition affected the male reproductive organs in adult mice. Figure 2A  
33 shows that the masses of testes and epididymis from adult F1-LPD mice were significantly lower  
34 than those from control mice. However, the weight of the seminal vesicles did not appear to be  
35 strongly affected. In normal conditions, it is generally accepted that testes weight varies little  
36 between individuals from the same species <sup>18</sup>. However, the significantly lower testis weight  
37 recorded for F1-LPD mice compared to F1-CD could be linked to the lower body weight observed.

1 To determine whether this was the case, we calculated the testis/body weight ratio for Balb/c mice.  
2 Figure S2 shows that, across a large group of mice raised in conditions without nutritional stress,  
3 there was no correlation between the weight of the animal and the testicle weight. These data  
4 suggest that the smaller testis weight recorded for the F1-LPD mice is not due to their reduced  
5 overall stature, but is a consequence of the nutritional stress experienced during early life. As a  
6 counter example, our data revealed a strong correlation between the animals' weight and that of  
7 their epididymal adipose tissue.

8 Based on these findings, we explored the hypothesis that a developmental defect occurred during  
9 the period of nutritional stress. In males, testicular cell lines differentiate, proliferate, and mature  
10 during postnatal life, particularly during suckling. These processes are crucial in establishing future  
11 reproductive capacity. Stresses experienced during suckling could thus impair fertility in adult  
12 animals<sup>19</sup>. Figure 2B shows that body weight was significantly lower in F1-LPD animals from 5 days  
13 after birth. However, significant differences in AGD (Figure 2B) and testis weight (Figure 2C) were  
14 only observed after 15 days. These observations suggest that the lactation period could be critical  
15 in determining the impact of maternal nutrition on the future reproductive capacity of male offspring.  
16 Despite the anatomical differences recorded for F1-LPD testis, spermatogenesis does not appear  
17 to be altered. Indeed, sperm collected in the cauda epididymis had similar cell morphology (not  
18 shown) and were present in equivalent numbers (Figure 2D) between F1-CD and F1-LPD males.  
19 These results were reinforced by histological analysis of testis sections, showing no differences  
20 between the two groups of mice (Figure 2E).

#### 21 Maternal protein malnutrition reduces the duration of sperm fertility in the female reproductive tract

22 As mentioned above, the reduced fertility observed for the F1-LPD males seemed to be neither the  
23 result of a behavioral problem, nor of a problem with sperm production. Thus, it is reasonable to  
24 hypothesize that sperm fitness is affected in these animals. For a given species, in normal  
25 conditions, the lifespan of sperm cells in the female reproductive tract is adapted to the interval  
26 between the onset of estrus and ovulation, allowing sperm to survive in a fertilization-competent  
27 form until ovulation occurs<sup>20</sup>. However, in rodents, there is a certain disparity concerning the timing  
28 of copulation relative to the female's estrogen cycle. In mice (as it is the case in human), males  
29 mount females regardless of their estrus state<sup>21</sup>. We therefore considered whether the timing of  
30 copulation, relative to the female's estrus cycle, could be a determinant factor in the reduced fertility  
31 observed for F1-LPD males. We speculated that the fertilizing capacity of the F1-LPD male semen  
32 might be affected by the interval between copulation and ovulation. To test the hypothesis that  
33 longevity and/or fertilizing capacity of sperm cells in the female genital tract might differ between  
34 F1-CD and F1-LPD males, we used a well-established protocol to synchronize ovulation in control  
35 females by exposure to gonadotropins.

36 In a first experimental procedure (Figure 3, protocol A), males were mated with females overnight  
37 (i.e. over a short time window) to allow copulation only at the time of the hormonally-stimulated

1 ovulation (ovulation is indicated in Figure 3 by a red lightning bolt). In this set-up, no differences in  
2 the rate of female pregnancy were observed between F1-CD and F1-LPD males, thus sperm  
3 produced by F1-LPD males could fertilize oocytes. In contrast, in a second experimental procedure  
4 (Figure 3, protocol B), males were mated with females in a copulation window of 57 h to 42 h before  
5 ovulation (considering ovulation to occur at T<sub>0</sub>). In these conditions, the F1-CD males could still  
6 successfully fertilize the females, but the capacity of the F1-LPD males to do so was severely  
7 compromised. These data indicate that F1-LPD sperm could no longer fertilize oocytes if they  
8 remained in the female reproductive tract for too long before ovulation. This result suggests that  
9 the fertilizing capacity of the sperm cells produced by F1-LPD males decreased rapidly once in the  
10 female reproductive tract.

#### 11 Maternal protein malnutrition alters capacitation process

12 Sperm are maintained inactive in the epididymis for relatively long periods of time (1–2 weeks,  
13 depending on the species). When sperm are released into the female reproductive tract, the change  
14 in environment acts as a physiological trigger, and sperm start their capacitation process. This  
15 process, necessary to allow oocyte fertilization<sup>22,23</sup>, involves remodeling of lipids and proteins<sup>24</sup>,  
16 resulting in alterations to membrane fluidity<sup>25</sup>. Capacitation is also associated with an increase in  
17 oxidation levels that may affect the sperm's lifespan (DNA and lipid damage lead to a loss of sperm  
18 motility and a commitment to cell death)<sup>26,27</sup>.

19 To understand the underlying causes of the observed alteration in fitness of sperm produced by  
20 F1-LPD males, we first used a Computer-assisted Semen Analyzer (CASA) to assess physiological  
21 parameters in sperm isolated from the cauda epididymis. As shown in Figure 4A, after 1 h of *in vitro*  
22 capacitation, the percentage of motile F1-LPD sperm cells was significantly decreased  
23 compared to F1-CD samples whereas no such difference was observed before capacitation.  
24 Moreover, the percentage of hyperactivated sperm cells after 1 h of *in vitro* capacitation was also  
25 significantly decreased in F1-LPD compared to F1-CD. These data led us to conclude that, before  
26 the start of capacitation, sperm cell motility is no different between the two groups, but that  
27 differences appear in response to capacitation signals. From these observations, we propose two  
28 non-exclusive hypotheses: the *in vitro* capacitation process is (i) either less efficient in F1-LPD  
29 sperm compared to F1-CD and/or (ii) leads to a premature commitment of F1-LPD sperm to cell  
30 death.

31 To explore further the impact on capacitation, we measured and analyzed the level of protein  
32 tyrosine phosphorylation (the gold standard for assessing capacitation) from F1-CD and F1-LPD  
33 sperm. Data given Figure 4B show a quantification of three separate individuals per group as well  
34 as a representative blot. It shows that the intensity of the bands representing tyrosine-  
35 phosphorylated proteins in F1-CD sperm extracts was maximal after 60 min incubation in  
36 capacitating medium. Interestingly, although the kinetic profile for tyrosine phosphorylation was no  
37 different for F1-LPD sperm extracts, the phosphorylation intensity was significantly lower after

1 60 min. These results indicate that the capacitation process was strongly affected in F1-LPD sperm  
2 cells.

3 Capacitation is essential to successful oocyte fertilization, and any defects in this process  
4 compromise the fertilization competence of sperm. Overall, our results strongly suggest that F1-  
5 LPD sperm are less fit, thus their fertility may be reduced in challenging conditions. To test this  
6 hypothesis, we determined how many two-cell embryos were obtained upon *In Vitro* Fertilization  
7 (IVF) of oocytes with either F1-CD or F1-LPD sperm. In these experiments, the percentage of 2-  
8 cell embryos is regarded as the *in vitro* fertilization rate. We chose to incubate sperm in a  
9 capacitation medium for a long challenging time (12 h) before mixing gametes as a simulation of  
10 what occurs in the genital female tract *in vivo* when copulation takes place a long time before  
11 ovulation. Figure 4C shows that after 12 h of *in vitro* capacitation, the *in vitro* fertilization rate was  
12 strongly reduced for F1-LPD sperm compared to F1-CD sperm. Thus, after a long *in vitro*  
13 capacitation step, F1-LPD sperm were less capable of fertilizing oocytes.

14 Overall, these data show that a low maternal dietary protein intake during gestation and lactation  
15 is associated with altered sperm fitness in the offspring, resulting in a lower capacity to successfully  
16 fertilize oocytes when copulation takes place early before ovulation.

## 17 **Discussion**

18 The aim of this article was to determine whether a maternal diet low in protein affected fertility in  
19 offspring at adulthood. Our results indicate that maternal nutritional stress during gestation and  
20 lactation decreased fertility in male offspring.

### 21 1/ Sperm capacitation is altered in F1-LPD sperm

22 Our results demonstrate that sperm fertilizing competence is altered due to an important  
23 capacitation defect. The capacitation process corresponds to the various changes that are required  
24 for sperm cells to become capable of fertilizing oocytes. It occurs as sperm pass through the female  
25 reproductive tract. As sperm are transcriptionally and translationally inactive, all the changes  
26 leading to capacitation are controlled by complex signaling cascades involving post-translational  
27 modifications of proteins (phosphorylations) and redox processes<sup>28</sup>. Thus, sperm capacitation  
28 involves a series of primary events such as influx of extracellular Ca<sup>2+</sup> and Na<sup>+</sup>, increase in cyclic-  
29 AMP, decrease in intracellular pH, changes in membrane phospholipid content and loss of  
30 membrane cholesterol, leading to alterations to membrane fluidity<sup>25</sup>. In sperm from F1-LPD males,  
31 both the overall intensity of tyrosine phosphorylation (a marker of capacitation), and the proportion  
32 of hyperactivated sperm cells following *in vitro* capacitation were decreased compared to control  
33 sperm. These observations suggest a defect in the sperm's response to the capacitation signal,  
34 which may be caused by several factors, acting in isolation or in combination.

1 Deregulation of the redox balance: Whereas physiological levels of ROS are vital for optimal sperm  
2 function, when present at excess levels, ROS adversely affect sperm quality and function,  
3 ultimately resulting in infertility<sup>26,27</sup>. Interestingly, mitochondrial function is affected in animals born  
4 to mothers fed an LPD during gestation and lactation. Indeed, our previous studies indicated that  
5 F1-LPD animals present increased mitochondrial function in skeletal muscle and have an increased  
6 mitochondrial density in White Adipose Tissue<sup>5</sup>. Whether this increase in mitochondrial function  
7 also trigger oxidative stress in sperm cells has yet to be addressed. However, gene expression  
8 data (not shown) indicate that antioxidant enzymes such as GPX1, GPX3 and SOD3 are increased  
9 (1.3-fold each) in the epididymis in F1-LPD animals. This increased expression could be due to a  
10 defensive response to oxidative stress. As mentioned above, oxidative stress and excessive ROS  
11 production may affect sperm parameters such as motility (see<sup>29,30</sup> for review). The altered motility  
12 observed in F1-LPD sperm during *in vitro* capacitation (Figure 4A) might be the result of excess  
13 ROS, and thus increased oxidative stress.

14 Role of leptin: Leptin is a well-characterized metabolic actor involved in the regulation of fatty acid  
15 and cholesterol metabolism, which may play important roles in male reproduction. First, leptin plays  
16 a crucial role at the onset of puberty. For example, leptin signaling may be involved in the delayed  
17 puberty reported in pups of both sexes born from mothers exposed to perinatal food restriction<sup>31</sup>.  
18 In pigs, leptin has also been shown to influence sperm capacitation by enhancing cholesterol efflux  
19 and protein tyrosine phosphorylation<sup>32</sup>. Since leptin plasma concentration is strongly decreased in  
20 F1-LPD animals<sup>6</sup>, this could affect sperm capacitation through its effect on lipid metabolism.

## 21 2/ Fertile lifespan of F1-LPD sperm is compromised

22 For a given species, the fertile lifespan of sperm correlates directly with the interval between the  
23 onset of estrus and ovulation. In normal conditions, successful fertilization relies on heterogeneity  
24 among sperm cells. Since capacitation is a time-limited process, various sperm subpopulations co-  
25 exist and can capacitate at different times<sup>33,34</sup> (Figure 4D). This particularity responds to a  
26 physiological need to ensure that sperm will remain fertilization-competent until ovulation takes  
27 place. We have clearly shown that F1-CD males can fertilize females *in vivo*, whenever copulation  
28 occurs relative to ovulation. In contrast, sperm from F1-LPD males were unable to induce  
29 fertilization if copulation was not timed to coincide with ovulation. Similarly, IVF experiments  
30 showed that the percentage of sperm cells that lose their fertilizing competence following a long  
31 capacitation (12 h) is higher for sperm from F1-LPD than from F1-CD.

32 Altogether, these results demonstrate that maternal nutritional stress affects sperm physiology and  
33 particularly the *in vivo* sperm lifespan, but has no effect on spermatogenesis *per se*. The altered  
34 sperm lifespan may be due to (i) defective capacitation once in the female reproductive tract and/or  
35 (ii) decreased sperm heterogeneity due to a lack of the subpopulations of sperm cells showing  
36 delayed capacitation (Figure 4D).



1 In humans, it is important to note that 10 to 15% of men who consult for difficulties conceiving  
2 present an idiopathic infertility, without defects in the classical sperm parameters measured,  
3 including sperm morphology and concentration, DNA compaction and DNA breaks and sperm  
4 motility<sup>35</sup>. Sperm heterogeneity and sperm physiology are very rarely assessed and in particular  
5 sperm capacitation is never measured, and any defects affecting such a parameter could play a  
6 particularly important role in idiopathic infertility. In that context, identification of molecular  
7 mechanisms involved in the establishment and maintenance of the imprint leading to infertility in  
8 our mouse model will allow to study, explain, and ultimately treat these categories of infertilities in  
9 humans. Moreover, it would also be interesting to assess whether, in such patient, idiopathic  
10 infertility correlates with maternal nutritional stress.

## 11 **Materials and Methods**

### 12 Ethics statements

13 Maintenance of the mice and all experiments were approved by our institutional-animal care and  
14 use committee in conformance with French and European Union laws (permission to experiment  
15 on mice B63-150, local ethic committee CEMEAA18-13, animal facilities agreement C6334514,  
16 project agreement APAFIS#13710-2016122214418591 v7).

### 17 Experimental Design

18 All mice were housed individually in polycarbonate, standard mouse cages (31l\*20w\*15h cm3)  
19 containing wood chips bedding and a plastic tube for enrichment and were changed to clean cages  
20 every two weeks. The ventilated housing room was maintained at a 12:12 hour light-dark cycle  
21 beginning at 8 a.m., at an ambient temperature of 22±1°C and 60±5% humidity. All mice were fed  
22 ad libitum and given free access to water. Experimental diets were manufactured in our institute  
23 facilities (INRAE de Jouy-en-Josas, Sciences de l'Animal et de l'Aliment de Jouy –Régimes à  
24 Façon, Jouy-en-Josas, France).

25 Pairs of 10-week-old Balb/c virgin female mice from Janvier Labs (53941 Saint-Berthevin, France)  
26 were mated with a single male. At detection of vaginal plugs, females were allocated into 2 groups  
27 and fed either a Control Diet (CD) containing 22% protein or a Low Protein Diet (LPD) containing  
28 10% protein throughout gestation and lactation as previously described in<sup>6</sup>. Only litters of 4–10  
29 pups were included in subsequent experiments. After weaning at 4 weeks of age, the F1-CD and  
30 F1-LPD offspring, born respectively to CD or LPD-fed mothers were single-housed and were given  
31 standard chow diet (A03; Safe, Augy, France) throughout life.

### 32 Body weight and anogenital distance measurement

33 Body weight and anogenital distance (AGD) of all offspring were measured at 5, 15, 20 days and  
34 6 months of age. Body weight was measured using a standard top-loading laboratory balance.  
35 AGD (expressed in mm) was measured with a digital caliper from the center of the anus to posterior

1 edge of the genital papilla, by a single investigator to increase precision. Pups were gently  
2 restrained, and the anogenital area was subjected to slight tension to impart tautness to the region  
3 AGD measurements were corrected by cubic root of body weight (Anogenital index = AGI=  
4  $AGD/(BW)^{1/3}$ )<sup>16</sup>.

#### 5 Tissue collection for tissue weight measurement and histological analysis

6 Testis, perigonadal white adipose tissue, epididymis and seminal vesicles were collected and  
7 weighted from animals euthanized by cervical dislocation under isoflurane anesthesia. Testis  
8 destined to H&E staining were fixed immediately in 4% paraformaldehyde overnight at 4°C, then  
9 dehydrated in gradient ethanol, made transparent in xylene, and embedded in paraffin. Embedded  
10 tissues were cut into 5 µm sections, which were deparaffinized and rehydrated for hematoxylin and  
11 eosin (H&E) staining.

#### 12 Fertility evaluation

##### 13 *F1 Male fertility with non-synchronized females*

14 Adult F1-CD and F1-LPD male mice were caged with females from the animal supplier (Janvier  
15 Labs) at a 1:2 male to female sex ratio for 5 days. Plugs were checked every day and plugged  
16 females were removed and housed individually until parturition. The number of total females,  
17 plugged females, litters and offspring was counted to calculate the frequency of copulatory plug  
18 (FCP) and frequency of conception (FC).

##### 19 *F1 Female fertility*

20 Adult F1-CD and F1-LPD female mice were caged with males from the animal supplier (Janvier  
21 Labs) at a 1:2 male to female sex ratio for 5 days. Plugs were checked every day and plugged  
22 females were removed and housed individually until parturition. The number of total females,  
23 plugged females, litters and offspring was counted to calculate the frequency of copulatory plug  
24 (FCP) and frequency of conception (FC).

##### 25 *F1 Male fertility with synchronized/superovulated females*

26 Females from the animal supplier (Janvier Labs) were synchronized and superovulated using  
27 intraperitoneal injection of 5 units of pregnant mare serum gonadotrophin (PMSG) at 3pm on day  
28 1, followed by 5 units of human chorionic gonadotropin (hCG) 48 h later (at 3pm on day3). Ovulation  
29 occurs 12h following the hCG injection (at 3am on day4). Adult F1-CD and F1-LPD male mice were  
30 caged with synchronized/superovulated females at a 1:2 male to female sex ratio for 15 hours  
31 either the night from day 1 to day 2 (from 6pm day1 to 9am day2, i.e. from 42h to 57h before  
32 ovulation) or the night from day 3 to day 4 (from 6pm day3 to 9am day4, i.e. from 9h before ovulation  
33 to 6h after ovulation). Plugs were checked the next morning and plugged females were removed  
34 and housed individually until sacrifice 14 days later.

#### 35 Sperm capacitation analysis

##### 36 *Capacitation media*

1 The basic medium used throughout these studies for sperm preparation and in vitro capacitation  
2 was a modified Krebs Ringer medium (Whitten's-HEPES buffer (WH) containing 100mM NaCl,  
3 4.7mM KCl, 1.2mM KH<sub>2</sub>PO<sub>4</sub>, 1.2mM MgSO<sub>4</sub>, 5.5mM glucose, 1mM pyruvic acid, 4.8mM lactic  
4 acid, 20mM HEPES, pH 7.4). Capacitation medium contained 5mg/mL fatty-acid-free BSA (Sigma-  
5 Aldrich), 2mM CaCl<sub>2</sub> and 20mM NaHCO<sub>3</sub> in WH.

#### 6 Sperm collection

7 For all sperm analysis experiments, sperm were collected by pressure on cauda epididymis in  
8 1.0mL of non-capacitating WH medium and then counted using a Malassez hemocytometer

#### 9 Analysis of capacitation by Western blot

10 Sperm were incubated in capacitation medium at the final concentration of 15×10<sup>6</sup>cells/mL during  
11 0, 10, 30, 60, 90 or 120 min at 37°C, 5% CO<sub>2</sub>. At each time point, 0.75×10<sup>6</sup> cells were collected,  
12 centrifuged at 500g for five minutes, washed with 300μL of phosphate buffered saline (PBS),  
13 centrifuged at 500g for five minutes and then resuspended in Laemli buffer without β-  
14 Mercaptoethanol and boiled for five minutes. After a centrifugation at 7000g for five minutes, the  
15 supernatant was collected, boiled in the presence of 5% β-Mercaptoethanol (Sigma) for five  
16 minutes and then subjected to SDS-PAGE and transferred on nitrocellulose membrane (GE  
17 Healthcare #RPN3032D). Blots were blocked with Tris Buffered Saline (50mM Tris, 150mM NaCl)  
18 containing 0.1% v/v Tween 20 and 10% w/v low-fat dried milk. Membranes were probed overnight  
19 at 4°C with anti-phosphotyrosine antibody (1/1000, 05-321, clone 4G10, Merck Millipore) in  
20 blocking solution. After washing, membranes were incubated with the following secondary  
21 antibodies: anti-mouse horseradish peroxidase-conjugated (HRP) (Cell Signaling Technology #  
22 7076S, 1/5000). Detection was performed using the Immobilon Western Chemiluminescent HRP  
23 substrate (Millipore Immobilon Crescendo Western HRP substrate # WBLUR0500) on Syngene  
24 G:BOX camera, and densitometric analyses were carried out using ImageJ software.

25 Normalization was performed by using anti-Tubulin antibody (Cell Signaling Technology # 2144S,  
26 1/1000), in blocking solution. After washing, membranes were incubated with the following  
27 secondary antibodies: anti-rabbit horseradish peroxidase-conjugated (HRP) (Cell Signaling  
28 Technology # 7074S, 1/5000).

#### 29 Sperm motility analysis and In Vitro Fertilization (IVF)

##### 30 Sperm collection

31 For all sperm analysis experiments, mouse sperm, obtained by manual trituration of caudae  
32 epididymis in 1mL M2 were allowed to swim out for 10 min at 37°C then counted using a Malassez  
33 hemocytometer. Sperm were then capacitated in M16 medium containing 2% fatty acid-free bovine  
34 serum albumin (BSA) at 37°C in a 5% CO<sub>2</sub> incubator at a concentration of 2×10<sup>6</sup> sperm cells /mL  
35 for either 1h (for motility analysis) or 12h (for IVF)

##### 36 Sperm motility analysis

1 Before capacitation of after 1h capacitation, sperm suspensions were loaded on a 20- $\mu$ m chamber  
2 slide (Leja Slide, Spectrum Technologies) and placed on a microscope stage at 37 °C. Sperm  
3 parameters (sperm count, progressive motility and hyperactivated sperm) were examined using a  
4 computer-assisted semen analysis (CASA) system (Hamilton Thorne Research, Beverly, MA).

#### 5 *In vitro fertilization and embryo development*

6 Oocytes were collected from mature Balb/c females, synchronized by exposure to 5 units of  
7 pregnant mare serum gonadotropin (PMSG) and 5 units of human chorionic Gonadotropin (hCG).  
8 After 12h capacitation, sperm were washed with M16 then introduced into droplets containing >10  
9 oocytes. Oocytes were incubated with  $0.5 \times 10^6$  capacitated sperm (100 $\mu$ L) (37°C, 5% CO<sub>2</sub>) in M16  
10 medium, and unbound sperm were washed away after 4h incubation. Oocytes were washed and  
11 transferred to potassium simplex medium (KSOM) for culture to later stages. The percentage of  
12 the 2-cell embryos examined 24–30 h later was regarded as an indication of successful fertilization.

#### 13 **Acknowledgments**

14 We are grateful to the staff of the Installation Expérimentale de Nutrition (INRAE, site of Theix) for  
15 providing everyday care to the animals; Anne Terrisse-Lottier for her involvement in animals  
16 welfare; Joël Drevet (GReD, Université Clermont Auvergne) for helpful discussion and Rachel  
17 Guiton (GReD, Université Clermont Auvergne) for FACS analysis.

#### **References**

1. Barker DJ, Intrauterine programming of adult disease. *Mol Med Today* **1**:418–423 (1995).
2. Gingras V, Hivert M-F, Oken E, Early-Life Exposures and Risk of Diabetes Mellitus and Obesity. *Curr Diab Rep* **18**:89 (2018).
3. Ong TP, Guest PC, Nutritional Programming Effects on Development of Metabolic Disorders in Later Life. *Methods Mol Biol* **1735**:3–17 (2018).
4. Buckley AJ, Jaquiere AL, Harding JE, Nutritional programming of adult disease. *Cell and Tissue Research* **322**:73–79 (2005).
5. Jousse C, Muranishi Y, Parry L, et al Perinatal protein malnutrition affects mitochondrial function in adult and results in a resistance to high fat diet-induced obesity. *PLoS ONE* **9**:e104896 (2014).
6. Jousse C, Parry L, Lambert-Langlais S, et al, Perinatal undernutrition affects the methylation and expression of the leptin gene in adults: implication for the understanding of metabolic syndrome. *FASEB J* **25**:3271–3278 (2011).
7. Mascarenhas MN, Flaxman SR, Boerma T, et al, National, Regional, and Global Trends in Infertility Prevalence Since 1990: A Systematic Analysis of 277 Health Surveys. *PLoS Med* **9**:e1001356–12 (2012).

8. Kumar N, Singh AK, Trends of male factor infertility, an important cause of infertility: A review of literature. *J Hum Reprod Sci* **8**:191–196 (2015).
9. Carlsen E, Giwercman A, Keiding N, Skakkebaek NE, Evidence for decreasing quality of semen during past 50 years. *BMJ* **305**:609–613 (1992).
10. Wohlfahrt-Veje C, Main KM, Skakkebaek NE, Testicular dysgenesis syndrome: foetal origin of adult reproductive problems. *Clinical Endocrinology* **71**:459–465 (2009).
11. Rae MT, Palassio S, Kyle CE, et al, Effect of maternal undernutrition during pregnancy on early ovarian development and subsequent follicular development in sheep fetuses. *Reproduction* **122**:915–922 (2001).
12. Guzmán C, Cabrera R, Cárdenas M, et al, Protein restriction during fetal and neonatal development in the rat alters reproductive function and accelerates reproductive ageing in female progeny. *J Physiol* **572**:97–108 (2006).
13. Zambrano E, Rodríguez-González GL, Guzmán C, et al, A maternal low protein diet during pregnancy and lactation in the rat impairs male reproductive development. *J Physiol* **563**:275–284 (2005).
14. MacLeod DJ, Sharpe RM, Welsh M, et al, Androgen action in the masculinization programming window and development of male reproductive organs. *International Journal of Andrology* **33**:279–287 (2010).
15. Scott HM, Hutchison GR, Jobling MS, et al, Relationship between Androgen Action in the “Male Programming Window,” Fetal Sertoli Cell Number, and Adult Testis Size in the Rat. *Endocrinology* **149**:5280–5287 (2008).
16. Gallavan RH, Holson JF, Stump DG, et al, Interpreting the toxicologic significance of alterations in anogenital distance: potential for confounding effects of progeny body weights. *Reprod Toxicol* **13**:383–390 (1999).
17. Wainstock T, Shoham-Vardi I, Sheiner E, Walfisch A, Fertility and anogenital distance in women. *Reproductive Toxicology* **73**:345–349 (2017).
18. Clegg ED, Perreault SD, Klinefelter G, Assessment of male reproductive toxicology. *Principles and Methods of Toxicology* 1263–1299 (2001).
19. Olaso R, Habert R, Genetic and cellular analysis of male germ cell development. *J Androl* **21**:497–511 (2000).
20. Gomendio M, Roldan ER, Coevolution between male ejaculates and female reproductive biology in eutherian mammals. *Proc Biol Sci* **252**:7–12 (1993).
21. Hanson JL, Hurley LM, Female Presence and Estrous State Influence Mouse Ultrasonic Courtship Vocalizations. *PLoS ONE* **7**:e40782–11 (2012).
22. Shukla KK, Mahdi AA, Rajender S, Ion Channels in Sperm Physiology and Male Fertility and Infertility. *J Androl* **33**:777–788 (2012).
23. Santi CM, Orta G, Salkoff L, et al, Chapter Fourteen - K<sup>+</sup> and Cl<sup>-</sup> Channels and Transporters in Sperm Function. In: Wassarman PM (ed) *Gametogenesis Academic Press*, pp 385–421 (2013)

24. Austin CR, The “Capacitation” of the Mammalian Sperm. *Nature* **170**:326–326 (1952).
25. Travis AJ, Kopf GS, The role of cholesterol efflux in regulating the fertilization potential of mammalian spermatozoa. *J Clin Invest* **110**:731–736 (2002).
26. Aitken RJ, Reactive oxygen species as mediators of sperm capacitation and pathological damage. *Mol Reprod Dev* **84**:1039–1052 (2017).
27. Storey BT, Biochemistry of the induction and prevention of lipoperoxidative damage in human spermatozoa. *Mol Hum Reprod* **3**:203–213 (1997).
28. Ecroyd HW, Jones RC, Aitken RJ, Endogenous redox activity in mouse spermatozoa and its role in regulating the tyrosine phosphorylation events associated with sperm capacitation. *Biol Reprod* **69**:347–354 (2003).
29. Aitken RJ, Gibb Z, Mitchell LA, et al, Sperm Motility Is Lost In Vitro as a Consequence of Mitochondrial Free Radical Production and the Generation of Electrophilic Aldehydes but Can Be Significantly Rescued by the Presence of Nucleophilic Thiols<sup>1</sup>. *Biol Reprod* **87**:367–11 (2012).
30. Nowicka-Bauer K, Nixon B, Molecular Changes Induced by Oxidative Stress that Impair Human Sperm Motility. *Antioxidants* **9**:134–22 (2020).
31. Léonhardt M, Lesage J, Croix D, et al, Effects of perinatal maternal food restriction on pituitary-gonadal axis and plasma leptin level in rat pup at birth and weaning and on timing of puberty. *Biol Reprod* **68**:390–400 (2003).
32. Aquila S, Rago V, Guido C, et al, Leptin and leptin receptor in pig spermatozoa: evidence of their involvement in sperm capacitation and survival. *Reproduction* **136**:23–32 (2008).
33. Buffone MG, Verstraeten SV, Calamera JC, Doncel GF, High Cholesterol Content and Decreased Membrane Fluidity in Human Spermatozoa Are Associated With Protein Tyrosine Phosphorylation and Functional Deficiencies. *J Androl* **30**:552–558 (2009).
34. Buffone MG, Human sperm subpopulations: relationship between functional quality and protein tyrosine phosphorylation. *Hum Reprod* **19**:139–146 (2004).
35. Kothandaraman N, Agarwal A, Abu-Elmagd M, Al-Qahtani MH, Pathogenic landscape of idiopathic male infertility: new insight towards its regulatory networks. *npj Genomic Medicine* 1–9 (2016).

## Figures and Tables

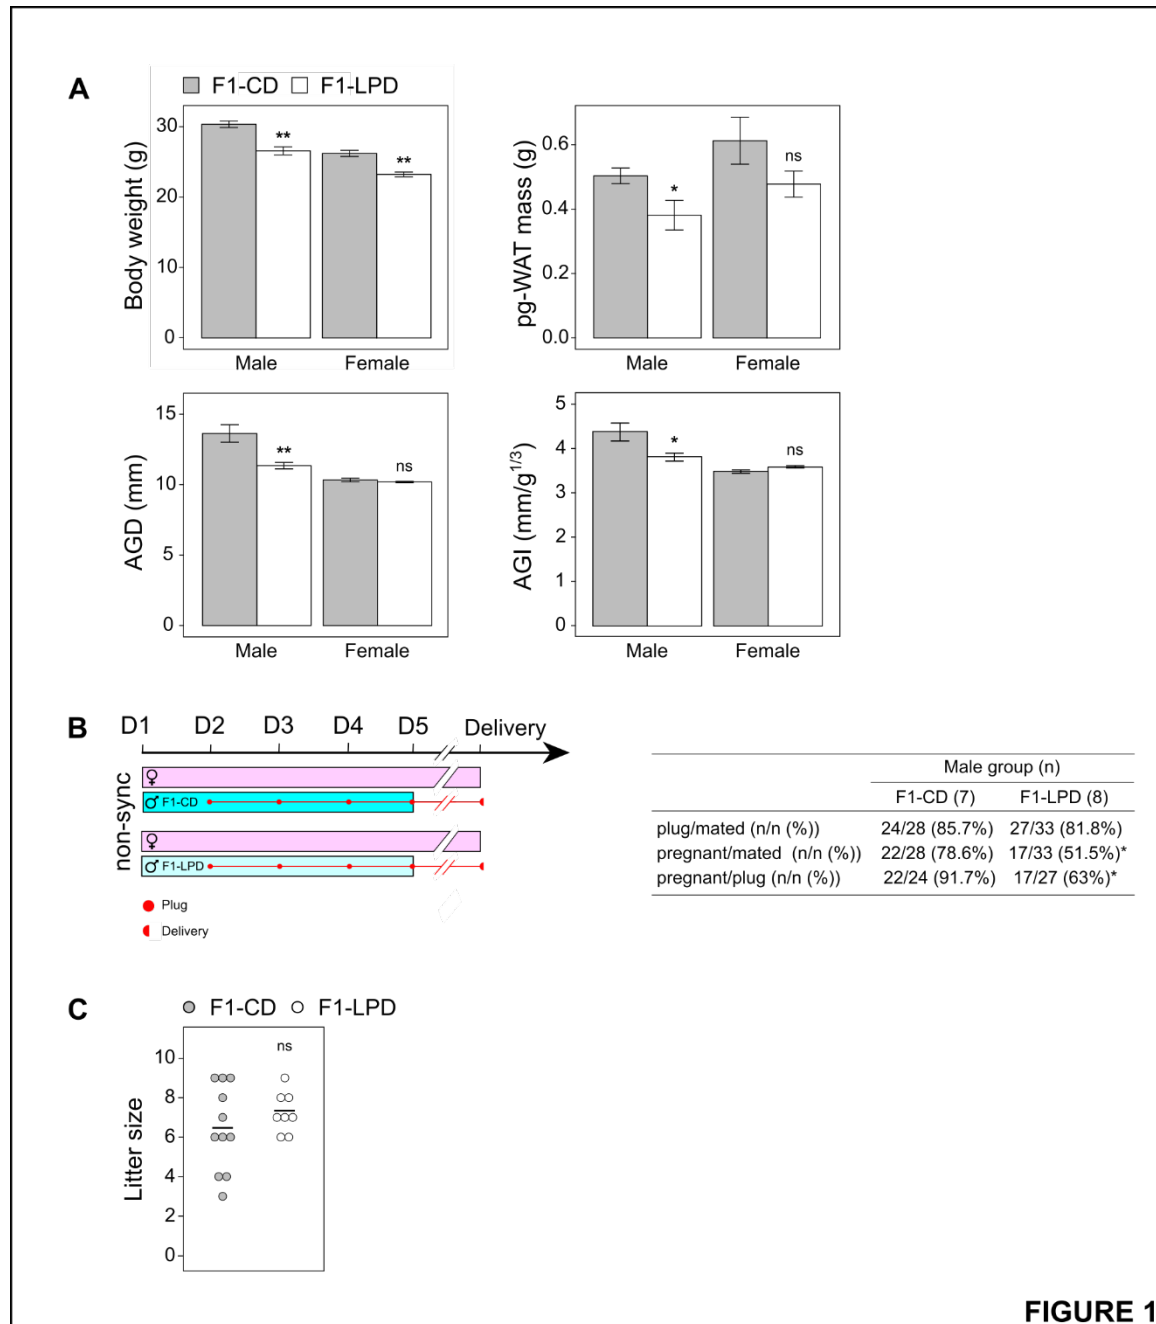

**FIGURE 1**

### Figure 1. Reproductive characterization of F1 offspring

**(A) Phenotypic characterization of F1 offspring.** Body weight, peri-gonadal White Adipose Tissue mass (pg-WAT), AnoGenital Distance (AGD) and AnoGenital Index (AGI) are given for F1-CD and F1-LPD adult males and females at 6 months of age. AGI is defined as  $AGD/(BW)^{1/3}$ . Results are expressed as means  $\pm$  SEM for at least 6 individuals per group and student's t-test was used to test the significance (\*\* p-value < 0.01, \* p-value < 0.05, ns= non-significant). For non-invasive

measures (BW, AGD and AGI) similar data obtained from a large number of individuals have not been included in the figure. **(B) Fertility evaluation of F1-CD and F1-LPD males when mated with Balb/c females.** F1-CD and F1-LPD males (blue bars) were caged with non-synchronized Balb/c females (pink bars) at Day 1 (D1) at a 1:2 male to female ratio for 4 days (until D5). Vaginal plugs were checked every day (●) and plugged females were removed and isolated until delivery (◐). For each group, the number of males tested, total females, plugged females and pregnant females were indicated in the table. Fertility rates are calculated as the percentage of plugged females that are pregnant. Statistical significance was calculated using a KHi-squared test. \* indicates a p-value < 0.05, ns= non-significant. **(C) Litter size of offspring obtained after mating of F1-CD and F1-LPD males with non-synchronized Balb/c females.** Each dot represents the litter size of offspring born to 1 Balb/c Female mated with either F1-CD or F1-LPD males. The black horizontal line represents the mean per group and student's t-test was used to test the significance (ns= non-significant).



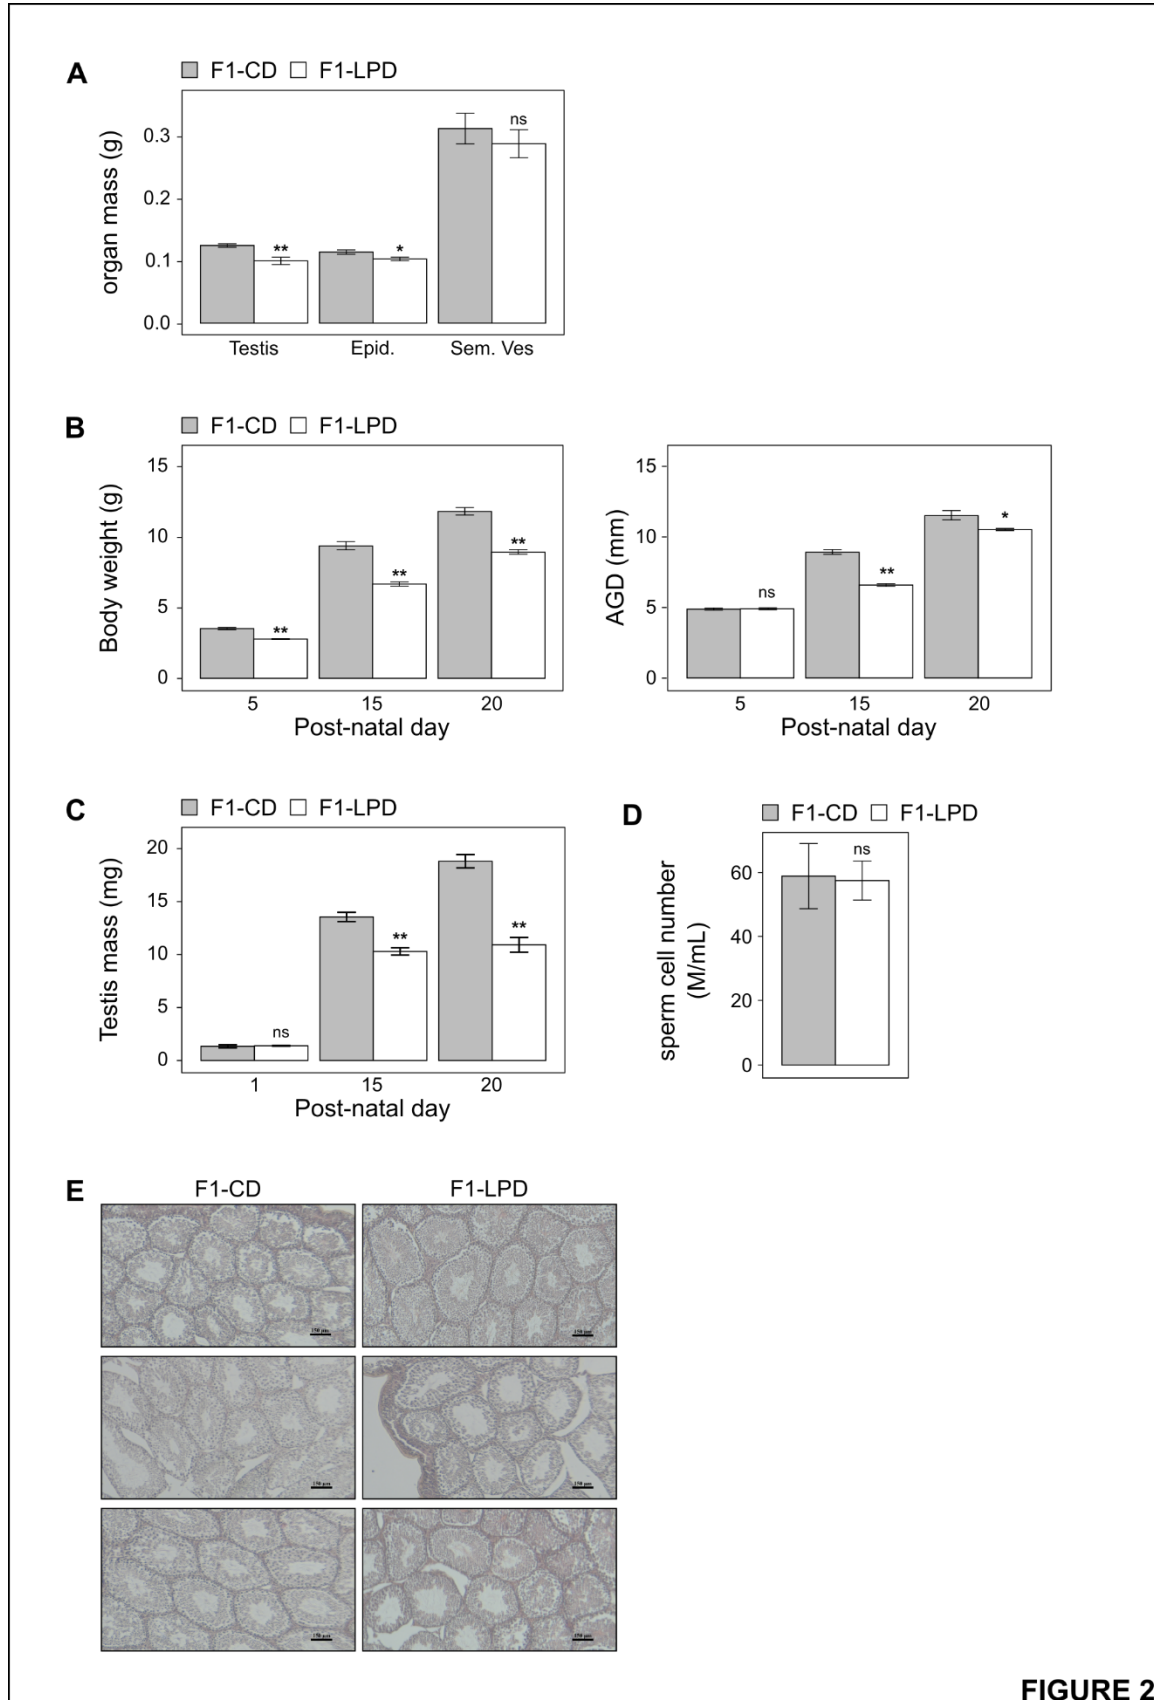

**FIGURE 2**

**Figure 2.** Reproductive organs analysis

**(A) Reproductive organ masses of F1 adult males.** Testis, Epididymis (Epid.) and Seminal Vesicles (Sem.Ves) masses are given for F1-CD and F1-LPD males at 6 months of age. Results are expressed as means +/- SEM for at least 6 individuals per group and student's t-test was used to test the significance (\*\* p-value < 0.01, \* p-value < 0.05, ns= non-significant). **(B) Body weight (g) and AnoGenital Distance (AGD, mm) of F1-CD and F1-LPD males during suckling period.** Body weight and AGD are given for F1-CD and F1-LPD males at 5, 15 and 20 post-natal day. Results are expressed as means +/- SEM for at least 6 individuals per group and student's t-test was used to test the significance (\*\* p-value < 0.01, \* p-value < 0.05, ns= non-significant). **(C) Testis weight of F1-CD and F1-LPD males during suckling period.** Testis weight are given for F1-CD and F1-LPD males at 1, 15 and 20 post-natal day. Results are expressed as means +/- SEM for at least 6 individuals per group and student's t-test was used to test the significance (\*\* p-value < 0.01, ns= non-significant). **(D) Sperm count.** Number of sperm cells following isolation from the cauda epididymis of 2-month old mice are expressed as millions of sperm cells per mL (M/mL) Results are expressed as means +/- SEM for at least 4 individuals per group and student's t-test was used to test the significance ns= non-significant). **(E) Hematoxylin/Eosin (H&E) staining of testis from 2-month old mice.** (n=3 for each group) Scale bar = 50µm

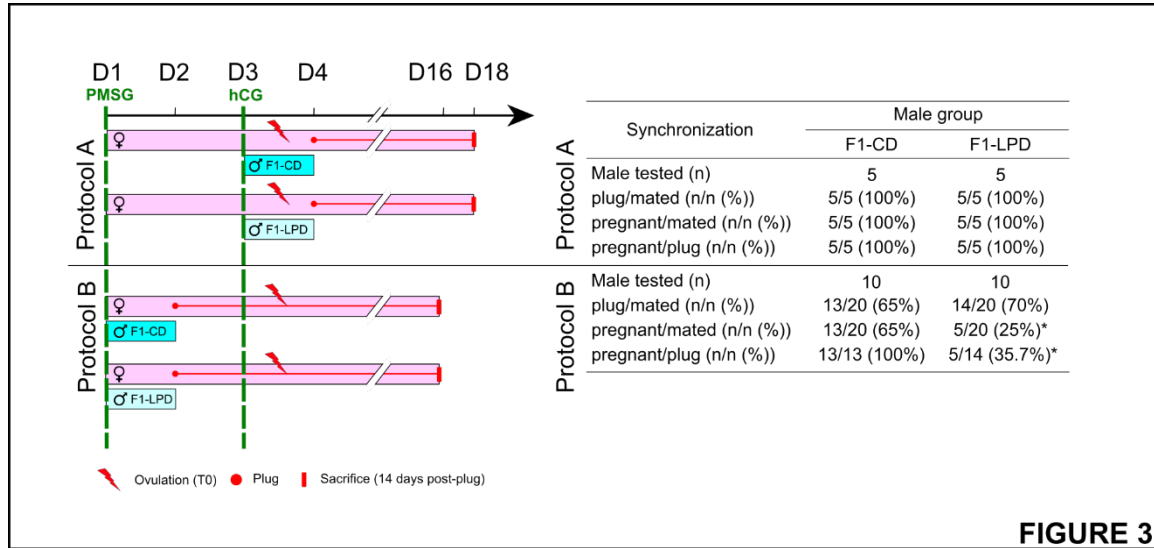

**FIGURE 3**

**Figure 3.** Fertilizing capacity evaluation of F1-CD and F1-LPD males mated with synchronized Balb/c females

F1-CD and F1-LPD males (blue bars) were caged with Balb/c females (pink bars) at a 1:1 (Protocol A) or 1:2 (Protocol B) male to female ratio for 1 day according to 2 different protocols. In both cases, females were hyper-ovulated and synchronized by intraperitoneal injection of PMSG (at D1, green dashed line) followed by hCG 48h later (at D3, green dashed line). Ovulation takes place the night following hCG injection, i.e. between D3 and D4, characterized by a red lightning bolt. In protocol A, males and females were caged together during the ovulation period, between D3 and D4. In protocol B, males and females are caged together between D1 and D2, about 48h before ovulation. For both protocols, vaginal plugs were checked (●) at the end of the copulatory period and plugged females were removed and isolated for 14 days. Females were thus sacrificed (|) in order to evaluate pregnancy. For each group and each protocol, the number of males tested, total females, plugged females and pregnant females were indicated in the table. Fertility rates are calculated as the percentage of plugged females that are pregnant. Statistical significance was calculated using a Kchi-squared test. \* indicates a p-value < 0.05.

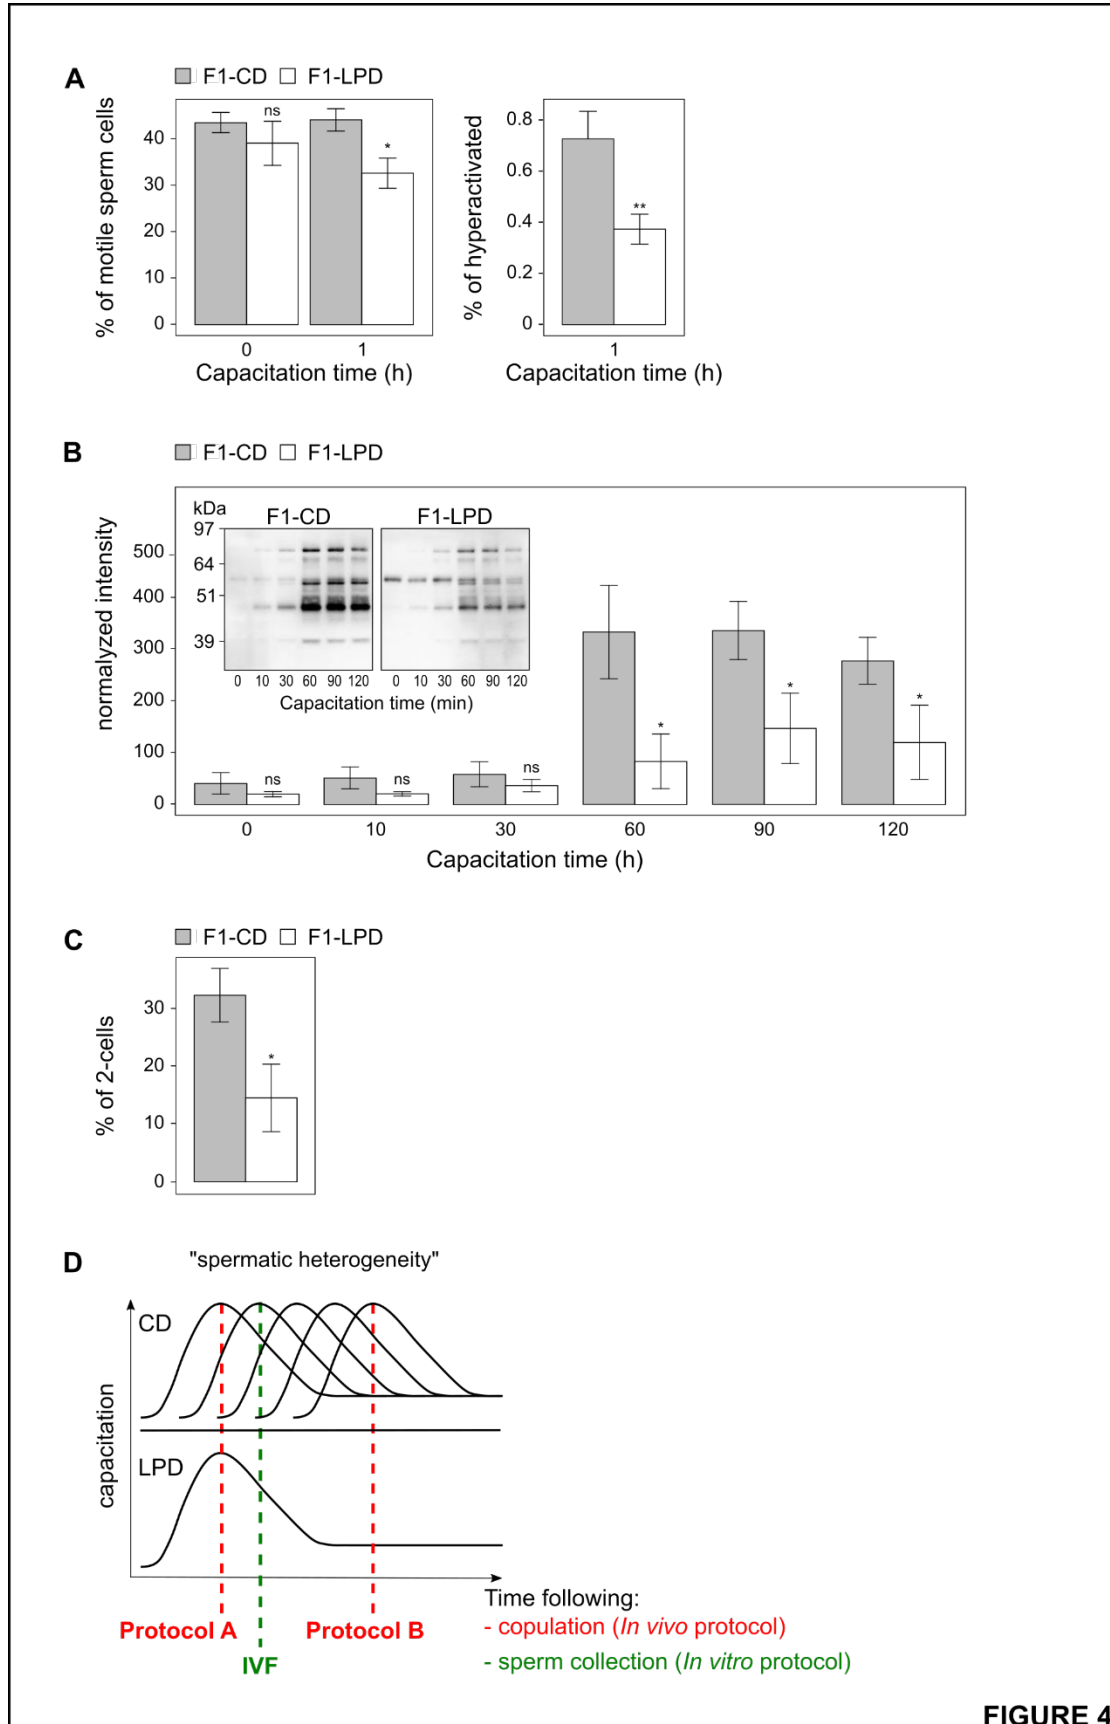

FIGURE 4 20

**Figure 4. Sperm cell parameters and functionality**

**(A) Sperm cell parameters (motility and activation).** Motility and activation parameters (% of hyperactivated) evaluated by CASA (Computer Aided Sperm Analysis) are shown for sperm cells before capacitation and after 1h of capacitation. Mean +/- SEM for each parameter is shown for n=8 in the F1-CD group and n=11 for the F1-LPD group. Student's t-test was used for comparison between groups. Statistical significance is indicated on the graphs: \* p-value < 0.05, \*\* p-value < 0.01, ns= non-significant). **(B) Capacitation efficiency determined with anti-phosphotyrosine Western blot.** Identical numbers of sperm cells, isolated from cauda epididymis of 3 F1-CD and 3 F1-LPD mice, were incubated 0, 10, 30, 60, 90, 120 min in classical capacitation medium for *in vitro* capacitation kinetics. Protein extracts were analyzed by Western blotting analysis of protein Tyrosine phosphorylation using anti-phosphotyrosine antibody. Protein loads were controlled with TGX stain free precast gels and a quantification was realized using ImageJ software. Mean +/- SEM is shown for n=3 in each group. Student's t-test was used for comparison between groups. Statistical significance (\*) is indicated on the graphs for p-value <0.08. The blot given is representative of semen from three separate individuals of each group. **(C) Fertilization competence of sperm isolated from F1-CD and F1-LPD males using in vitro fertilization assay.** Sperm were isolated from 4 males of each group and incubated in capacitating medium for 12h. Oocytes were isolated from Balb/c hyperovulated females. Fertilization competence was measured by determining the percentage of two-cell embryos obtained 24h after fertilization of at least 10 oocytes per male sample. **(D) Schematic representation of the spermatic heterogeneity hypothesis.**

|                         | Female group  |               |
|-------------------------|---------------|---------------|
|                         | F1-CD         | F1-LPD        |
| Female tested (n=)      | 16            | 12            |
| % plug/mated female     | 16/16 (100%)  | 10/12 (83.3%) |
| % pregnant/mated female | 14/16 (87.5%) | 7/12 (58.3%)  |
| % pregnant/plug         | 14/16 (87.5%) | 7/10 (70%)    |

Fig. S1. Fertility evaluation of non-synchronized F1-CD and F1-LPD Females when mated with Balb/c Males.

F1-CD and F1-LPD Females were caged with Balb/c Males at Day 1 at a 1:2 male to female ratio for 4 days. Vaginal plugs were checked every day and plugged females were removed and isolated until delivery. For each group, the number of females tested, plugged females and pregnant females were indicated in the table. Fertility rates are calculated as the percentage of plugged females that are pregnant. Statistical significance was calculated using a KChi-squared test. ns = non-significant.

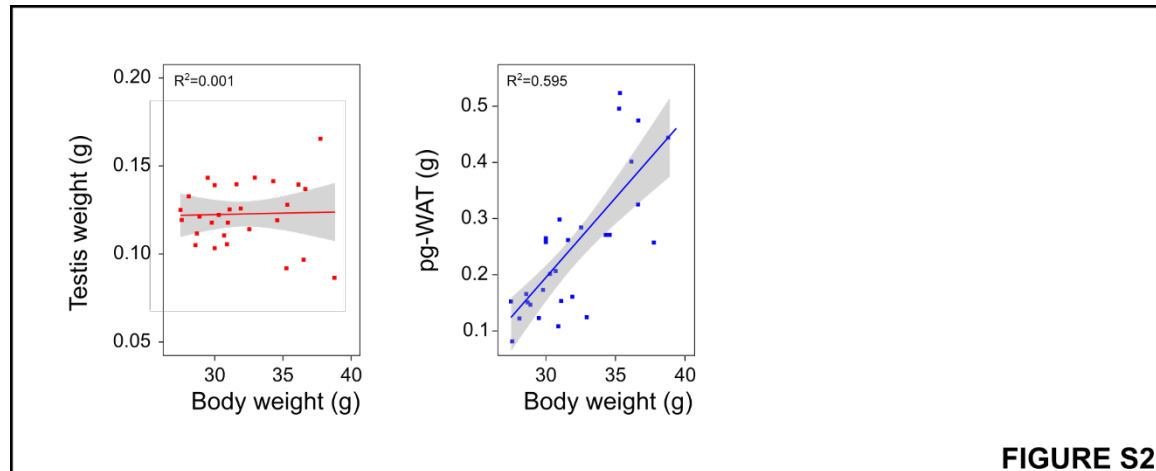

**Fig. S2.** Correlation between Body weight and Testis weight or perigonadal-White Adipose Tissue weight (pg-WAT) in Balb/c males.

The testis mass (in red) and perigonadal-WAT mass (in blue) of a large cohort of adult Balb/c males (n=28) were represented as a function of Body weight.  $R^2$  represents the R-squared of the linear regression model.
